# Supplementary material for: Risk prediction for breast Cancer in Han Chinese women based on a cause-specific Hazard model
Source: Springer Nature journal article supplement (doi:10.1186/s12885-019-5321-1), 2019-02-07
Supplement: 12885_2019_5321_MOESM4_ESM.pdf [file 12885_2019_5321_MOESM4_ESM.pdf]

# Questionnaire of women health

No 1 \_\_\_\_\_

No 2 \_\_\_\_\_

## I. Basic information

1. Name \_\_\_\_\_, Location \_\_\_\_\_  
Birthdate: \_\_\_\_\_, Age \_\_\_\_\_, Telephone \_\_\_\_\_
- 1.1 Living environment (1)Urban (2)Suburban (3)Rural
- 1.2 Registered residence (1)Urban (2)Rural
2. Occupation:(1)Farmer,(2)Worker,(3)Teacher, (4)Civil service, (5)Individual traders,(6)Driver,(7)Services,(8)Staff,(9)Housewife, (10) Health care, (11) Student (12) Other \_\_\_\_\_
- 3.Education level: \_\_\_\_\_ Education Year
- 3.1 Highest level of education: (1)Primary or below (2)Junior high school (3)Senior middle or vocational high school (4)University (5)Post-graduate
4. Height \_\_\_\_\_meters (with two decimal points 1.62); Weight \_\_\_\_\_Kg(with one decimal points, 52.5)
- 4.1 Waistline \_\_\_\_\_meters, Hipcircumference \_\_\_\_\_meters
5. Number of family members \_\_\_\_\_, Personal annual income \_\_\_\_\_, Family annual income \_\_\_\_\_
- 5.1 How is your family economic status? 1=Very good 2=Good 3=Common 4=Poor 5=Very poor
- 5.2 How is your family social status? 1=Very good 2=Good 3=Common 4=Poor 5=Very poor
- 6 Marital status
- 6.1 Marital status:(1)Single; (2)Married and living together; (3)Married but separated >3 months; (4)Divorced; (5) Windowed (6) Married after divorce (7) Unmarried cohabitation (8) Other \_\_\_\_\_
- 6.2 Parity \_\_\_\_\_; Pregnancy \_\_\_\_\_; Miscarriages \_\_\_\_\_, if yes, age at 1<sup>st</sup> miscarriage \_\_\_\_\_
- 6.3 Times of full term produce \_\_\_\_\_ 88=not suitable
- 6.4 Age at 1<sup>st</sup> pregnancy at term \_\_\_\_\_ 88= not suitable
- 6.5 Children? \_\_\_\_\_ 88= not suitable
- 6.5.1 Boys \_\_\_\_\_个, 88= not suitable
- 6.5.2 Girls \_\_\_\_\_个, 88= not suitable
- 6.5.3 Full term?:(1)Yes, (2)No 88= not suitable
- 6.5.4 Breast feeding? (1)Yes, (2)No; 88= not suitable
- 6.5.5 If yes ,breastfeeding duration \_\_\_\_\_months 88= not suitable
- 6.6 Use of contraceptive drugs? (1)Yes (2) No 88= not suitable
- 6.6.1 If yes, use duration \_\_\_\_\_years 88= not suitable
7. Physiological state
- 7.1 Age at menarche \_\_\_\_\_; Menstrual pattern, regular? (1)Yes, (2)No
- 7.2 Menstrual period \_\_\_\_\_days, Intermenstrual period \_\_\_\_\_days
- 7.3 Dysmenorrhea: (1)Yes, (2)No;
- 7.4 Postmenopausal? (1)Yes, (2)No; If yes, age at menopause \_\_\_\_\_  
If yes, use of hormone replacement (1)Yes, (2)No; 88=not suitable  
If postmenopausal, weight gain? (1)Yes, (2)No, If yes, how many \_\_\_\_\_

## II. Disease and family history

### (1) Disease history

- 8.1 Ever diagnosed as breast cancer? If yes, when yy/mm, where A/B/C degree hospital
- 8.2 Ever diagnosed as benign breast tumor? If yes, when yy/mm, where A/B/C degree hospital
- 8.3 Ever diagnosed as breast hyperplasia? If yes, when yy/mm, where A/B/C degree hospital

- 8.4 Ever diagnosed as nipple discharge? If yes, when yy/mm, where A/B/C degree hospital
- 8.5 Ever diagnosed as accessory breast? If yes, when yy/mm, where A/B/C degree hospital
- 8.6 Ever diagnosed as retracted nipple? If yes, when yy/mm, where A/B/C degree hospital
- 8.7 Ever diagnosed as other gynecological neoplasms ?
- 8.7.1 Cervical cancer: (1)Yes,(2) No; If yes, when yy/mm, where A/B/C degree hospital
- 8.7.2 Ovarian cancer: (1)Yes,(2) No; If yes, when yy/mm, where A/B/C degree hospital
- 8.7.3 Ovarian cyst: (1)Yes, (2) No; If yes, when yy/mm, where A/B/C degree hospital
- 8.8 Ever diagnosed as other chronic disease?
- 8.8.1 Diabetes mellitus: (1)Yes, (2) No; If yes, when yy/mm, where A/B/C degree hospital
- 8.8.2 Hypertension: (1)Yes, (2) No; If yes, when yy/mm, where A/B/C degree hospital
- 8.8.3 Coronary heart disease: (1)Yes, (2) No; If yes, when yy/mm, where A/B/C degree hospital
- 8.8.4 Other malignancies: (1)Yes, (2) No; If yes, when yy/mm, where A/B/C degree hospital
- 8.8.5 Nephritis: (1)Yes, (2) No; If yes, when yy/mm, where A/B/C degree hospital
- 8.8.6 Mental disorders: (1)Yes, (2) No; If yes, when yy/mm, where A/B/C degree hospital

## (2) Breast cancer family history

- 9.1 First-degree relatives (father, mother, son, daughter, brothers and sisters) ever diagnosed as breast cancer?  
(1)Yes ,(2)No ; If yes, Who \_\_\_\_\_, How many \_\_\_\_\_
- 9.2 Second-degree relatives (uncle, aunt, grandparents, ) ever diagnosed as breast cancer?  
(1)Yes ,(2)No ; If yes, Who \_\_\_\_\_, How many \_\_\_\_\_
- 9.3 Third-degree relatives (cousins) ever diagnosed as breast cancer?  
(1)Yes ,(2)No ; If yes, Who \_\_\_\_\_, How many \_\_\_\_\_

## III. Living habits

### 10 Smoking

- 10.1 Do you smoke? (1)Never (2)Occasionally (3) often
- 10.2 Age at first smoking \_\_\_\_\_, How many years of smoking\_\_\_\_\_ (Duration excluded, when quit smoking)。
- 10.3 When smoking, how many cigarretes per day \_\_\_\_\_
- 10.4 If you don't smoke, Do people around smoke? (1)Yes, (2)No

### 11 Drinking

- 11.1 Do you drink? (1)Never (2)Occasionally (3) often
- 11.2 If yes, how many years
- 11.3 Age at first drink?
- 11.4 Have you got drunk? (1)Never(2)1-2 times(3) 3-5 times(4) 6-9 times(5)10times or over
- 11.5 Type of drinking (1) white spirit;(2)beer;(3)red wine;(4)white wine (5)other
- 11.6 Average drinking volume? \_\_\_\_\_,how many times do you drink every month? \_\_\_\_\_

### 12 Diet: 1=Nearly everyday (5-7d every week) , 2= 3-4d every week, 3= 1-2d every week, 4=almost never

- |                                                |   |   |   |   |
|------------------------------------------------|---|---|---|---|
| 12.1 Bean product (bean curd, bean milk)       | 1 | 2 | 3 | 4 |
| 12.2 Fresh beans (green soyabeans, broad bean) | 1 | 2 | 3 | 4 |
| 12.3 Red meat (pork, mutton, beef)             | 1 | 2 | 3 | 4 |
| 12.4 Dairy products:                           | 1 | 2 | 3 | 4 |

|                                                                                       |   |   |   |   |
|---------------------------------------------------------------------------------------|---|---|---|---|
| 12.5 Corn products                                                                    | 1 | 2 | 3 | 4 |
| 12.6 Carrot                                                                           | 1 | 2 | 3 | 4 |
| 12.7 Fried foods (fried meat, fried pasta)                                            | 1 | 2 | 3 | 4 |
| 12.8 Colored vegetables or fruit                                                      | 1 | 2 | 3 | 4 |
| 12.9 Garlic                                                                           | 1 | 2 | 3 | 4 |
| 12.10 Ham                                                                             | 1 | 2 | 3 | 4 |
| 12.11 Pickled food (brined vegetable, salted egg, salted meat)                        | 1 | 2 | 3 | 4 |
| 13.Tea? (1)Yes (2)No If yes, what kind of tea (1)green tea (2)black tea (3)other_____ |   |   |   |   |
| 14 Coffee? (1)Yes (2)No                                                               |   |   |   |   |

### 15 Sleep

|                                                                                                     |  |  |  |  |
|-----------------------------------------------------------------------------------------------------|--|--|--|--|
| 15.1 How many hours do you sleep? Since when yy mm                                                  |  |  |  |  |
| 15.2 Always have trouble sleeping? (1)Yes (2)No                                                     |  |  |  |  |
| 15.3 Always have nightmares? (1)Yes, (2)No Since when yy mm                                         |  |  |  |  |
| 15.4 Do you have early-wake? (1)Yes (2)No Since when yy mm                                          |  |  |  |  |
| 15.5 Do you ever sleep late? (1)Yes (2)No Since when yy mm                                          |  |  |  |  |
| 15.6 Are you satisfied with your sleep? ①very satisfied ②satisfied ③dissatisfied ④very dissatisfied |  |  |  |  |

### 16 Sports activities

|                                                                                             |  |  |  |  |
|---------------------------------------------------------------------------------------------|--|--|--|--|
| 16.1 Do you do exercises? (1)Never (2)Occasionally (3)Often                                 |  |  |  |  |
| 16.2 How often do you do exercises? (1)< 3 times every week (2)≥ 3 times every week         |  |  |  |  |
| 16.3 Your Current amount of exercise? (1) < 30 minutes every day (2) ≥ 30 minutes every day |  |  |  |  |

### 17. Personality

|                                                         |  |  |  |  |
|---------------------------------------------------------|--|--|--|--|
| 17.1 Are you introvert? (1) Yes (2)Ordinary (3)No       |  |  |  |  |
| 17.2 Are you full of passion? (1) Yes (2)Ordinary (3)No |  |  |  |  |
| 17.3 Are you impatient? (1) Yes (2)Ordinary (3)No       |  |  |  |  |

### 18 Life satisfactory degree 1=Very satisfied 2=Satisfied 3=Common 4=Dissatisfied 5=Very dissatisfied 88=Not suitable

|                                  |   |   |   |   |   |    |
|----------------------------------|---|---|---|---|---|----|
| 18.1 Current life                | 1 | 2 | 3 | 4 | 5 | 88 |
| 18.2 Current income              | 1 | 2 | 3 | 4 | 5 | 88 |
| 18. Current physical status      | 1 | 2 | 3 | 4 | 5 | 88 |
| 18.4 Current housing conditions: | 1 | 2 | 3 | 4 | 5 | 88 |
| 18.5 Current marital status      | 1 | 2 | 3 | 4 | 5 | 88 |
| 18.6 Current medical conditions  | 1 | 2 | 3 | 4 | 5 | 88 |
| 18.7 Current neighborhood        | 1 | 2 | 3 | 4 | 5 | 88 |
| 18.8 Life of six months ago      | 1 | 2 | 3 | 4 | 5 | 88 |
| 18.9 Life of 1 year ago          | 1 | 2 | 3 | 4 | 5 | 88 |
| 18.10 Life of 5 years ago        | 1 | 2 | 3 | 4 | 5 | 88 |
| 18.11 Life of 1 year later       | 1 | 2 | 3 | 4 | 5 | 88 |
| 18.12 Life of 5 years later      | 1 | 2 | 3 | 4 | 5 | 88 |

### IV. Medications or use of chemical drugs

|                                                                    |  |  |  |  |
|--------------------------------------------------------------------|--|--|--|--|
| 19.1 Antidepressant drug (1)No (2)Yes; If yes, Since when yy mm    |  |  |  |  |
| 19.2 Antihistamine drug (1)No (2)Yes; If yes, Since when yy mm     |  |  |  |  |
| 19.3 Diuretic (1)No (2)Yes; If yes, Since when yy mm               |  |  |  |  |
| 19.4 Antiemetic drugs (1)No (2)Yes; If yes, Since when yy mm       |  |  |  |  |
| 19.5 Antihypertensive drugs (1)No (2)Yes; If yes, Since when yy mm |  |  |  |  |

|                       |       |         |                    |    |    |
|-----------------------|-------|---------|--------------------|----|----|
| 19.6 Sleeping pills   | (1)No | (2)Yes; | If yes, Since when | yy | mm |
| 19.7 Estrogenic drug: | (1)No | (2)Yes; | If yes, Since when | yy | mm |
| 19.8 Hair dye         | (1)No | (2)Yes; | If yes, Since when | yy | mm |

## V. Other

- 20.1 Do you usually concern for breast care? (1)Never (2) Occasionally (3) often
- 20.2 Do you know breast self-examine? (1)Yes (2)No
- 20.3 Have you ever examined your own breast? (1)Yes (2)No
- 20.4 Do you regularly go to special hospital for breast examinations ? (1)Yes (2)No
- 20.5 Do you know breast cancer? (1)Yes (2)No
- 20.6 Do you think screening is helpful for early detection of breast cancer? (1)Yes (2)No
- 20.7 Do you think the early detection of breast cancer can improve survival? (1)Yes (2)No
- 20.8 Have you ever done breast screening? (1)Yes (2)No
- Have you ever received the clinical touch (1)Yes (2)No
  - Have you ever done X-ray examination? (1)Yes (2)No
  - Have you ever done breast ultrasound? (1)Yes (2)No
- 20.9 knowledge about breast symptoms
- Do you think the local discomfort of breast is a signal of breast cancer occurrence?  
(1)Yes (2) No (3)Don' t know
  - Do you think the lump in your breast is a signal of breast cancer occurrence ?  
(1)Yes (2) No (3)Don' t know
  - Do you think the axillary nodes is a signal of breast cancer occurrence ?  
(1)Yes (2) No (3)Don' t know
  - Do you think the nipple retraction is a signal of breast cancer occurrence ?  
(1)Yes (2) No (3)Don' t know
  - Do you think the nipple discharge liquid is a signal of breast cancer occurrence ?  
(1)Yes (2) No (3)Don' t know
- 20.10 Related factors of breast cancer
- Do you think age at menarche before 12 may cause breast cancer?  
(1)Yes (2) No (3)Don' t know
  - Do you think no parity or late childbirth may cause breast cancer?  
(1)Yes (2) No (3)Don' t know
  - Do you think menopause at a late age may cause breast cancer?  
(1)Yes (2) No (3)Don' t know
  - Do you think long time drinking may cause breast cancer?  
(1)Yes (2) No (3)Don' t know
  - Do you think high-fat diets may cause breast cancer?  
(1)Yes (2) No (3)Don' t know
  - Do you think Long-term use of estrogen drugs may cause breast cancer?  
(1)Yes (2) No (3)Don' t know

g. Do you think people who have a family history of breast cancer is more likely to have breast cancer?  
(1)Yes (2) No (3)Don' t know
